# Supplementary material
Source: publisher site journal article supplement (https://www.spandidos-publications.com/243/downloadSupplementary)

Figure S1. Viability of HSMMs exposed to palmitate. Cell viability was measured in a CCK-8 assay, as previously described. Briefly, differentiated HSMMs treated with 100 or 200 mM PA were cultured in a 96-well tissue culture plate. After 24 h, 10  $\mu$ l CCK-8 solution was added to each well and the cells were incubated for another 4 h at 37°C. Relative cell viability was determined by scanning with an ELISA reader with a 450 nm filter and calculated based on a CCK-8 assay. There was no significant reduction in cell viability in these experiments. CCK-8, Cell Counting Kit-8; HSMMs, human skeletal muscle myotubes; NS, not significant; PA, palmitate.

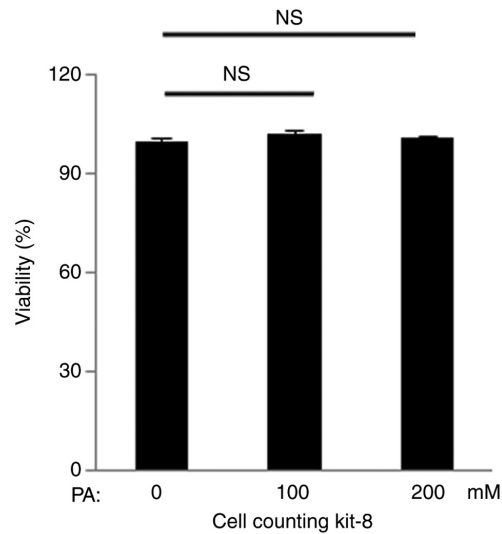

Figures S2. GLP-1 receptor expression in human skeletal muscle myotubes. GLP-1, glucagon like peptide-1.

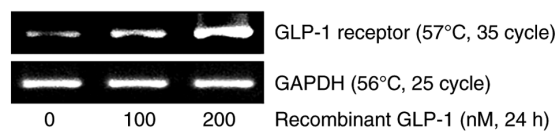

Figure S3. Transfection efficiency on the expression of SIRT1. Cells were transfected with siRNA GFP or siRNA SIRT1 for incubated 72 h, then the SIRT1 RNA level was measured by reverse transcription quantitative-PCR. Primers 5'-TTGGAC TCTGGCATGTCCCA-3' and 5'-CATTTTCCATGGCGC TGAGG-3'. \* $P < 0.05$  vs. siRNA GFP. Si, small interfering; GFP, green fluorescent protein; SIRT1, sirtuin 1.

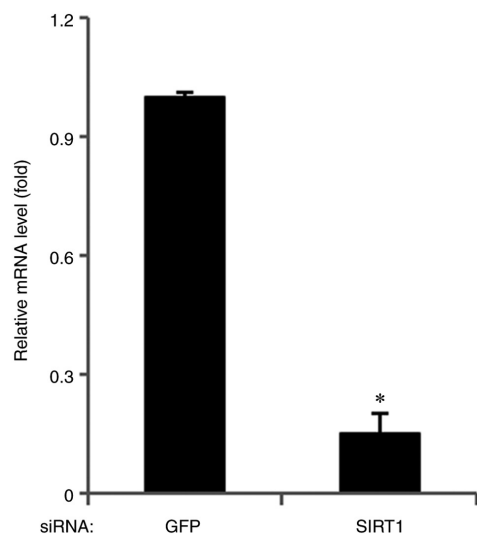

Supplement: Supplementary file 1 [file downloadSupplementary]
